# Supplementary material for: Whole egg consumption in relation to bone health of the US population: a cross-sectional study
Source: Royal Society of Chemistry journal article supplement (doi:10.1039/d3fo04248k), 2024-01-01
Supplement: d3fo04248k1.pdf [file d3fo04248k1.pdf]

**Supplemental Table 1** Association of whole egg consumption with osteoporosis (N = 13243)

|         | Overall Osteoporosis |                   |                   | P <sub>trend</sub> |
|---------|----------------------|-------------------|-------------------|--------------------|
|         | Reference            | Egg Class 1       | Egg Class 2       |                    |
| Overall |                      |                   |                   |                    |
| Model 1 | 0                    | 1.02 (1.00, 1.04) | 0.99 (0.98, 1.01) | .873               |
| Model 2 | 0                    | 1.01 (0.99, 1.02) | 1.00 (0.99, 1.01) | .520               |
| Model 3 | 0                    | 1.01 (0.99, 1.02) | 1.00 (0.99, 1.01) | .603               |

Model 1 was not adjusted. Model 2 was adjusted for age, gender, body mass index (BMI), and race/ethnicity. Model 3 was further adjusted for smoking status, physical activity, the ratio of family income to poverty, educational level and healthy eating index and based on model 2.
